# Supplementary material for: Standardized field methods for fracture-focused surface processes research
Source: Copernicus journal article supplement (doi:10.5194/esurf-2022-61), 2022-12-12
Supplement: Supplementary file [file esurf-2022-61-CC1-supplement.pdf]

1 A compilation and review of fracture analysis field methods for surface processes research ought to be a  
2 valuable contribution and within the scope of this journal.

3 I enjoyed this MS and I think it's a valuable contribution.

4 The paper is well written and clearly illustrated.

5 There are several places in the text, noted below, where clarifications are needed. A clarification that  
6 should be added right at the outset of the paper is: how much of this methodology applies to 'outcrops'  
7 and how much to 'clasts'. It seems like the MS aims to be relevant to both, but this should be spelled  
8 out. And later in the text, where the text is more germane to outcrops or clasts, care needs to be taken  
9 to make this clear to the reader.

10 A key part of the methodology selection recommended here, it seems to me, comes down to a  
11 preference for 2D (window) sampling methods compared to 1D (scanline) methods. In my opinion, some  
12 of the contrasts that are made are too strong and ought to be more nuanced. Both methods have their  
13 strengths and weaknesses, and in some cases the best method may depend on what type of exposure is  
14 available. If the fracture size range is large and patterns are arranged in simple sets and the outcrop is  
15 large, scanlines may provide the most robust and readily collected data. If orientation patterns are  
16 unorganized and exposures are small (or the object to be measured is a clast), then maybe 2D methods  
17 are the only ones that will work. Aperture measurements from scanlines give conceptually unambiguous  
18 results, whereas methods that rely on length measurements run into the problem of defining length.  
19 Some of these problems are indeed discussed in the text, but currently I think this aspect of the text is a  
20 bit misleading and could be better.

21 It seems to me that at last pointing to recent methods to characterize spatial arraignment would be  
22 worth doing; the clustering and connectivity of patterns a key attributes. With drones etc many of these  
23 attributes can be readily measured and quantified. There is the 2018 Journal of Structural Geology  
24 special issue on spatial arrangement, and several papers in 2022 extending 1d techniques to 2d. From a  
25 geomorphic perspective, some of these methods might be a real advantage to go beyond the limits  
26 afforded by outcrop size, by comparison with 2 measures of topography, vegetation, etc. For a link to  
27 the literature see R. Correa et al. 2022, J. Struct. Geol.

28 A more specific statement of claims at the end of the Introduction would be helpful.

29 As noted below, changing the 'crack' and 'fracture' terminology usage would make the paper clearer  
30 and more readable.

31 Some care needs to be taken in words ending in -ing. Both 'fractures' and the process of 'fracturing'  
32 could be meant in some circumstances, but in some cases its not clear which is meant.

33 29 Fracture terminology needs to be used with caution. Terms should be descriptive, which means that  
34 relations to stress states (which need to be inferred) should be avoided. 'Opening-mode' is fine, widely  
35 used, and better than the alternatives ('joint', 'vein'). The term 'shear fractures' has been criticized in a  
36 widely cited review (Pollard and Aydin, 1988, GSA Bull.); a better term is 'fault'. 'Compression mode'  
37 should be omitted. This is a stress term, and 'compression mode' cannot be determined by looking at a  
38 fracture in the field (see the discussion in Laubach et al. 2019, Reviews of Geophysics). All modes of  
39 fractures can form in compression or extension. Compression is one of the most common loading

40 conditions that lead to opening-mode fractures, for example (Hancock, 1985; Engelder, 1985). These  
41 stress terms are not descriptive (so inappropriate for field terms) and should be restricted to where the  
42 loading conditions are known, for example in experiments and, I supposed, monitored fracture  
43 propagation in the field.

44 30-32 While it is true that some fractures form at or near the Earth's surface, many fractures form at  
45 depth (even at great depth) and some of these fractures make it into the outcrop. I think a casual reader  
46 here might mistake your meaning and (incorrectly) think that all fractures form in the near surface. I  
47 suggest adding a phrase to clarify this: "...bodies (Molaro et al. 2020), as well as at depth (e.g. Laubach et  
48 al., 2019, Rev. Geophys., which provides links to many other papers)." This at least alerts readers that  
49 near or at surface fractures are not necessarily the result of near or at-surface processes, on this planet  
50 or elsewhere.

51 32 On the use of 'crack' and 'fracture' interchangeably. Although this usage is widespread it has the  
52 potential to cause confusion, particularly where these may be language barriers. The text jumps back  
53 and from between 'fracture' and 'crack' and I found this distracting. In brittle structural geology a case  
54 has been made for restricting 'crack' to experimental and theoretical applications, and 'fracture' for  
55 features observed in the field. I believe this convention is stated in Anders et al. 2014, Microfractures: a  
56 review, J. Struct. Geol.) Maybe field-monitored examples you have described on fracture propagation in  
57 outcrops or clasts would fall into the category of 'cracks' by this convention. My advice is to make a  
58 distinction between these two terms along these lines and revise the MS accordingly. Even if the  
59 distinction has not been made in the past in this field, it would be useful to do so now.

60 I also note that in structural geology the preference in description is to distinguish 'opening-mode'  
61 fractures from 'faults'. In this literature, if one type or the other is the main focus, this may be stated at  
62 the outset, and subsequently the features are just called 'fractures'. Faults and fractures are usually  
63 readily distinguished in the field and doing so is commonly among the first steps in outcrop fracture  
64 analysis. For some commentary on these distinctions see papers by D. Peacock.

65 33 This seems strangely phrased, it makes it seem like this is possibly mistaken usage. Dikes and some  
66 veins *are* fractures; the veins that are 'filled' with secondary minerals (i.e., they are not replacement  
67 deposits) are also definitely fractures. This construction also misses that key observation that many  
68 fractures are only partly filled with mineral deposits. I hope that the field methods for fracture surface  
69 processes would include a step where such features are sought; in many cases all that is needed is a  
70 knowledge of what to look for and a hand lens.

71 34 The 'size, number, and orientation' doesn't capture all the controls, so I advise adding to this list.  
72 These are attributes at the same level as the ones you list. 'Connectivity' has long been recognized as a  
73 key to strength and fluid flow (e.g. Long and Witherspoon, 1985) and since the 1990's there have been  
74 useful methods for quantifying and documenting these attributes in the field (e.g. Sanderson and Nixon,  
75 2015; Healy et al. 2018; see the reference list in Forstner & Laubach J. Struct. Geol. 2022). Connectivity is  
76 one aspect of spatial arrangement; another is the pattern of fracture arrangement in space (evenly  
77 spaced fractures, random, clustered in space). Fractures clustered in space are an extremely widespread  
78 phenomenon that often has an impact on landscapes, the locus of rock mass weakness, and fluid flow.  
79 There are quantitative methods to rapidly document these attributes in the field in 1d and 2D (see the  
80 reference list in Correa et al. 2022, J. Struct. Geol.). Finally, mineral deposits, even subtle inconspicuous  
81 ones, can dramatically affect strength, strength anisotropy, and fluid flow. Some of these deposits are

82 inherited from fracture formation and depth, other may form in shallow subsurface or in outcrop. I hope  
83 standardized field methods would aim to notice these.

84 35 An 'e.g.', needed here. The role of fractures on rock mechanical properties (and rock mass  
85 properties) goes way back.

86 44 I think you mean '...factors that control *near surface* rock fracturing...' Factors 'controlling' and the  
87 'rates and processes' at depth will be different. Most of the standard methods, however, are for  
88 describing aspects of pattern geometry, etc. not necessarily rates and processes directly. So maybe the  
89 statement of the goals should be amended here (44) to '...factors that control near surface fracture and  
90 fracture pattern attributes, rates, and processes...?'

91 56 'detailed' seems like a vague word. I suggest you mention specific scales or omit.

92 60-61 Although fair enough 'microfractures' are not features usually distinguishable in the field, as by  
93 definition (e.g. Anders et al. 2014, J. Struct. Geol. review) they require microscopy to document. But  
94 since the time of Dale (1920) it has been known that microfracture populations can control strength  
95 anisotropy and that this can affect how rocks subsequently fracture in outcrop or as building stones. In  
96 principle a simple unconfined axial point load test can reveal such a fabric (I've seen this done using a  
97 Schmidt hammer). So it is not outside the realm of possible field methods to attempt to make the  
98 distinction or to collect samples to investigate the presence of microfractures back in the lab. For certain  
99 rock types, like quartz arenites or quartzites and some granites, such fabrics are to be expected and a  
100 field method punch list that didn't at least include the option of looking at this seems like it would be  
101 misleadingly incomplete. My suggestion is that in your list of preferred field methods that this be  
102 included as an option, with some references to reviews of methods.

103 96 The first clause of this paragraph needs clarification. It's probably also an example of where a  
104 distinction between 'crack' and 'fracture' would be useful. I think what you are talking about here is  
105 standardized methods for 'direct or monitored observation of crack propagation' in outcrops or clasts. If  
106 that's the case, the statement is fine (but needs clarification), but while there may not be a specific  
107 check lists for outcrop fracture characterization (some sort of 'official' standardization) it would be  
108 wrong to say that there are 'limited studies' of reproducible fracture characterization in outcrop. Much  
109 of the diversity of such studies in the literature has to do with the specific aims of the studies. Outcrop  
110 analog studies of subsurface fractures fossilized in outcrop typically identify (to the extent they can) and  
111 omit features that formed in near-surface environments.

112 107-111; 119-128 Some of this variance has to do with inherent ambiguities in the features being  
113 measured, for example length and connectivity. Some of this is discussed in Forstner & Laubach 2022,  
114 and before that Ortega and Marrett 2000. These built-in ambiguities are a reason 1D aperture  
115 measurement scanlines (e.g. Ortega et al. 2006) are valuable: aperture measurements on scanlines are  
116 reproducible; length measurements not so much.

117 In my opinion, this paragraph could use some work. Using comparators seems like it follows from your  
118 topic sentence. But comparator use like suggested by Ortega et al. is primarily for 1D scanline data sets.  
119 The rest of the concepts in the paragraph in its current form seem jumbled. Line 2 starting "For example,  
120 our approach...is preferable..." is only defensible in the context of some specific application; for many  
121 applications documenting separate, but mechanically linked fractures would be preferable, for example,

122 in comparing outcrops to fracture growth models, for inferring stress states, for understanding  
123 connectivity and fluid flow, etc. Without further evidence or argument, I'm not even sure this is (always)  
124 the best approach in the context of geomorphology. So maybe this assertion should wait until you  
125 develop these arguments.

126 It seems to me that what you are trying to say here is along these lines: "We incorporate the suggested  
127 best practices from the two case examples above as well as from other published methods research.  
128 Some methods are well attested to be reproducible in field studies. For example, field measurements  
129 using comparators are effective for opening displacements particularly for sub mm widths (e.g. Ortega  
130 et al., 2006) (section 8.4.2). Window sampling tends to provide accurate measurements of networks  
131 (e.g. Zeeb et al., 2013) with the least user-variance (Andrews et al., 2019). Other measurements such as  
132 length and connectivity may have low reproducibility (Andrews et al. 2019) owing to various  
133 observational and conceptual problems including dependence on scale of observation (e.g. Ortega and  
134 Marrett 2000) and require construction of rules to assure reproducibility (Forstner & Laubach 2022).  
135 We recommend rules that are suitable to geomorphic applications."

136 All these aims need to consider the limitations dictated by the size and quality of exposure and the  
137 resolution limits and biases of outcrop documentation methods.

138 128 Wu and Pollard 1995 is not 'several studies' but is an account of an experimental study so it seems  
139 like a strange call out for a section on field methods. Field data has many ambiguities and challenges  
140 that simple experimental results avoid. In any case, earlier in the paragraph you recommend using a  
141 fracture size cut off, so that's not a 'complete inventory'. I think 127-8 can be omitted.

142 132-136 Some of this seems a bit garbled. The Milad and Slatt example is strangely specific (and  
143 probably not a 'common' one); the Hennings et al example as stated is quite vague. These both seem in  
144 the wider 'non geomorphology' uses category. The third example seems to be geomorphology adjacent,  
145 and so not parallel with the other two. I suggest that you make the non-geomorphology examples more  
146 general in scope but describe them a bit more specifically and move this up to right after your topic  
147 sentence. The move to the geomorphology adjacent topic and geomorphic aims.

148 Suggested revision from line 130 "We chose standardized methods optimized for collecting data  
149 relevant to geomorphology. These methods differ from those for outcrop fracture studies with other  
150 goals, such as using outcrops as guides (analogs) for deep subsurface fractures. Such studies aim to  
151 distinguish mechanical and fracture stratigraphy (e.g. references); corroborate fracture patterns related  
152 to various processes such as folding (e.g. references); obtain fracture statistics for discrete fracture  
153 models (e.g. references), or test efficacy of forward geomechanical fracture models (e.g references). For  
154 these applications, near-surface and geomorphology-related fractures are noise and need to be omitted  
155 (e.g. Sanderson, 2016; Ukar et al. 2019). For such studies, mineral filled fractures may be more useful or  
156 appropriate than open fractures, yet we discount such sealed fractures because they may have less  
157 impact on geomorphic processes. Our results are germane to near surface (shallow) studies such as  
158 validating geophysical measurements..." etc.

159 140 The Introduction seems to lack a clear statement of claims. I suggest adding some.

160 143-168 This section should be edited to make it clear that your focus and assertions are on the  
161 geomorphic setting. It has long been known, separately from subcritical crack concepts, that much  
162 fracture in the Earth is repetitive and protracted rather than a single catastrophic event.

163 155 I suggest calling out the 2019 Reviews of Geophysics paper 'Role of chemistry in fracture pattern...'  
164 here. This introduces some of the more recent literature on this topic.

165 164 It seems to me that you could call out some more recent measurement methods papers here; for  
166 sedimentary rocks, for example, the laboratory and analysis procedures have much advanced since  
167 1963. See the 2019 Rev. Geophy. Paper for some more appropriate references.

168 172 Why not include a one-line explanation for what this approach is? This paragraph could use some  
169 work making it friendly to readers not up on the soils literature. Here's a recommendation starting at  
170 line 170: "Parent material, topography (and other loads), climate, biota, and time all potentially impact  
171 initiation and propagation of surficial fractures in rocks. Consequently, as in soil analysis (e.g., Jenny,  
172 1941; Phillips, 1989) a 'state factor' approach taking all these factors into consideration is appropriate  
173 for rock fracture analysis...'

174 This seems fine; but I'd be surprised if these concepts were absent from the rock mechanics literature.  
175 Maybe some additional reference checking is needed?

176 193-235 Is there a reason that these sections are presented in this order? It seems like a logical order  
177 starts with the material (maybe things are different in soils, where the soil is a byproduct of climate). I  
178 suggest you mention 2.2.4 'parent material' first, then the loads, physical and chemical catalysts to  
179 fracture, and duration of loading.

180 Under 'parent material' you really ought to clearly note 'pre-existing fractures'; it is a rare outcrop that  
181 lacks fractures that formed in some setting long prior to exposure at the earth's surface. If your standard  
182 field methods do not take this into account, you stand a good chance of going astray. Some of this  
183 material is in 2.3, but that material is out of place there. Also, the criteria repeated in an old paper on  
184 fractures in tunnelling applications (Ewan et al 1983) is hardly a robust reference for criteria for  
185 identifying 'tectonic' fractures (this sounds like a straw man argument); better to cite Hancock, 1985, a  
186 review of brittle structure methods, and reviews of Geophysics, 2019, an updated review that explicitly  
187 points out the challenges and current methods for resolving these issues. The comment also also seems  
188 like discussion out of place here and should be taken up later instead.

189 Under parent material, before you start discussing the sizes and shapes of clasts, the first step should be  
190 diagnosing the parent material: Line 214—"The parent material (p) in the context of a fracture study  
191 refers to the specific rock type(s) containing fractures (and potentially undergoing fracture) in the  
192 geomorphic environment. Rock assessment should include the types and dimensions of material present  
193 (e.g. sandstone, siltstone, shale, granite etc.) and the types and spatial arrangements of interfaces  
194 within the material (beds; foliations). Many (perhaps most) rocks contain fractures that formed prior to  
195 exposure, either due to deep seated tectonics and fluid pressure loads (references) or to thermal and  
196 mechanical effect due to uplift towards the surface (e.g. references; Engelder; English & 2017). In  
197 sedimentary rocks fracture patterns (in some cases, fracture stratigraphy) varies with mechanical  
198 stratigraphy (e.g. Laubach et al. 2009, AAPG Bulletin) that can also influence near surface fracture. In  
199 many instances, mechanical properties variation may be reflected in fracture stratigraphy. Schmidt

200 hammer measurements (references) is also a useful, fast, and inexpensive field approach to  
201 documenting mechanical property variability. Although pre-existing fractures may not always be easily  
202 separable from those formed under geomorphological influence, an early step in fracture assessment  
203 should be to use standard approaches to categories outcrop fractures based on preferred orientations,  
204 crossing and abutting relations, and evidence of mineral deposits (e.g. Hancock, 1985 J. Struct. Geol.;  
205 Laubach et al. 2019)..."

206 232-233 Although what you describe here likely happens in some cases, this is not universally true. I'm  
207 not aware of any studies that document this. Given the challenges of determining when and why  
208 fractures form, this is unsurprising. Nevertheless, there are certainly some fractures that formed at  
209 depth and have made it to the surface unchanged. So some nuance is needed in revising this paragraph.

210 It seems like you have elided three things here. (a) One is the loading path, which can be quite long for  
211 old rocks, and include a wide range of past tectonic settings, which could influence the fracture patterns  
212 in the rock. (b) Another is the last part of the loading path, the thermal and mechanical changes that  
213 happen as a rock goes from depth to exposure. These effects might include modification (as you  
214 describe) or fractures that formed at depth, but it also might not. This uplift and (eventual) cooling path  
215 could also result in new fractures (a process recounted in a theoretical sense in a lot of structure text  
216 books). The extent of this process depends on how deeply the material was buried, how rapidly uplifted,  
217 and material properties (some of this is made more explicit in English, J.M., and Laubach, S.E., 2017.  
218 Opening-mode fracture systems – Insights from recent fluid inclusion microthermometry studies of  
219 crack-seal fracture cements. In Turner, J.P., Healy, D., Hillis, R.R., and Welch, M., eds., Geomechanics and  
220 Geology: Geological Society, London, Special Publications, 458, 257-272. doi:10.1144/SP458.1 (c) And  
221 finally, there is the current tectonic setting of the outcrop, which might be such that tectonic loads drive  
222 fractures (as in some pop ups in the US mid continent). You don't mention the concept of 'residual  
223 stress' but tht could also play a role here.

224 This section of your text doesn't give geomorphic workers much guidance as to what to do about it.  
225 Maybe: (1) from rock age and tectonic history of the region, qualitatively assess likelihood rock have a  
226 complex/simple fracture and mechanical property history; comparing fracture stratigraphy (if present)  
227 with mechanical property stratigraphy (from Schmidt hammer) determine if there is a discrepancy  
228 between the two; (2) from published burial history accounts, assess the uplift path; (3) situate the study  
229 in its current tectonic setting. A place to start is the world stress map: Heidbach, O., Rajabi, M., Reiter,  
230 K., & Ziegler, M. (2019). World stress map. In Encyclopedia of petroleum geoscience (pp. 1-8). Springer.

231 249 The removal of pre-existing fractures in clasts seems straightforward. But it is a matter of  
232 observation that pre-existing 'inherited' fractures exist within clasts. Inherited fractures are more likely  
233 to persist if they are mineral filled. But partly open fractures that have persisted in clasts are known. So  
234 inspecting clasts for evidence of such inherited fractures should definitely be a part of clast assessment.  
235 This goes back to the comment I made above about the need to investigate microfractures. In some  
236 materials arrays of sealed microfractures can impart a strong strength anisotropy. If you have a material  
237 with a strong strength anisotropy it may fracture under environmental conditions with a preferred  
238 orientation. Make microstructural observations and axial point load tests a part of the procedure?

239 277-8 Do you mean that clasts this small are likely to move, or to have been moved?

240 288-289 'common' and 'sparse' seem like vague relative terms. Can this be made more explicit?

241 310-311 some of this is redundant. Consolidate.

242 313-314 Hmm. Maybe Lapointe scanline undersampled small fractures, but this is not a general problem  
243 with scanlines. See for example Marrett et al. 2018, J. Struct. Geol. or Hooker et al. 2009, J. Struct. Geol.;

244 some of these scanlines document minute fractures and cover three orders of magnitude in size. The  
245 distinction is between 1D and 2D sampling, but window sampling has its biases too, and lengths are  
246 subjective to define and harder to trace out for the small size fraction.

247 337 How does this compare with the standard rock quality indices from rock fracture analysis?

248 336 You may be constrained by the size of outcrop available. Also, in many cases the 'best' (cleanest,  
249 largest) outcrop may be selectively the least fractured. This is a well-known bias in fracture analysis and  
250 ought to be mentioned. Vegetables like rock having open fractures.

251 350-353 The use of both fracture and crack terms here make this confusing.

252 357 Many readers may wonder what you are talking about with these mineral 'bridges'. I suggest that  
253 you call out a figure from the 2019 Rev. of Geophys. Paper. That way the meaning of the term will be  
254 clear (this is at least one example of this kind of phenomenon), and readers will be pointed to the  
255 literature on how such cement deposits form and how widespread they are.

256 601 Opening-mode fractures tend to grow in length via linkage, so determining 'length' where there is a  
257 hierarchy of linkage could be (usually is) a challenge. Measuring and quantifying the links and then  
258 prescribing a reproducible rule is helpful (e.g. Forstner and Laubach 2022).

259 617 Measuring apertures of where fractures cross scanlines is not subject to this bias. Outcrop studies  
260 show that for isolated mechanically linked segmented fractures the widest fracture will be in the center,  
261 where you would expect it based on fracture mechanics to be for a single strand fracture; but as  
262 patterns evolve and link the pattern can become complicated; (619) 'keeping in mind that the "center"  
263 of the fracture may be separated from the tips by physically separate segments'.

264 627 Note that comparators are scaled in different ways. The logarithmically binned comparator of  
265 Ortega et al. 2006 is best for documenting the size ranges of narrow fractures (this should be the  
266 standard tool).

267 630 Hmm. Not sure how common this 'misconception' is. I'm not sure how helpful citing an unattested  
268 misconception is.

269 642-643 So you make no distinction between 'open fracture network connectivity' and 'open fracture  
270 length' This seems like in practice it will lead to trouble. Also, you are dealing with 2d surfaces and 3D  
271 objects that may commonly connect out of the plane of the observation surface. Hmm.

272 737 I would say in the 'structural geology' literature (P10); 'density' is also used (Narr). Maybe add a  
273 reference for this: Dershowitz, W. S., & Herda, H. H. (1992, June). Interpretation of fracture spacing and  
274 intensity. In The 33rd US Symposium on Rock Mechanics (USRMS). OnePetro.

275
